# Supplementary material
Source: publisher figshare collection journal article supplement (https://tandf.figshare.com/articles/dataset/_/2068542)
Supplement: Supplementary file 1 [file 2]

**Sorenson et al. Supplemental Information contains the following:**

- 1. Supplemental Methods**
- 2. Supplemental Tables S4, S5, and S6**
- 3. Supplemental Data Set Information**
- 4. Supplemental Figures with legends**

**Supplemental Methods:**

**Yeast strain construction:**

To construct the *splicing factorXΔ::NAT set2D::G418* and *splicing splicing factorXΔ::NAT jhd1Δ::G418* double mutant strains (X=mud1, mud1, isy1, snu66, or ist3), we first created *Mat a splicing factorXΔ::NAT* SGA strains by transforming *MATa splicing factorXD::G418* strains (see Table S1 for details) with a PCR product encoding the clonNAT<sup>R</sup> (NAT) cassette sequence that included regions of homology with the G418 cassette for integration (see Table S2 for primer sequences and TableS3 for plasmid used for PCR). *Splicing factorXΔ::NAT* strains were selected on YEPD containing 200mg/mL clonNAT-Nourseothricin (Werner Biological) and their genotype was confirmed by PCR. Next, we mated the *MATa splicing factorXΔ::NAT* strains with the *MATα* SGA strain (YTK609), which is a derivative of the original SGA strains (Tong and Boone ref) and selected for diploids on YEPD containing 200μg/mL clonNAT. We used SM-LEU+NAT media (Min-LEU with monosodium glutamate, 100μg/mL canavanine, 100μg/mL s-AEC, 100μg/mL clonNAT) to isolate the *MATα splicing factorΔ::NAT* SGA strains confirmed genotypes by PCR (see YTK649, 660, 663,664, and 679). Next we mated the *MATα splicing factorΔ::NAT* SGA strain with either the *MA a set2Δ::G418* or *jhd1 Δ::G418* (see Table S1), isolated diploids on YEPD+NAT+G418 media, sporulated, and subsequently isolated haploid *MATa* double mutants on DM-His media (Min-HIS with monosodium glutamate, 100μg/mL canavanine, 100μg/mL S-(2-Aminoethyl)-L-cysteine hydrochloride, 150μg/mL G418, 100μg/mL clonNAT). The genotypes of the double mutant strain were strain confirmed by PCR. See Table S1 for a full list of strains used in this study.

To generate the *splicing factor* $\Delta$ ::G418 *H3K36A/R/Q* double mutants (X=mud1, mud1, isy1, snu66, or ist3) we mated the *MATa splicing factor* $\Delta$ ::G418 strains (OpenBiosystems) with either the *MAT $\alpha$  H3K36A*, *H3K36R* or *H3K36Q* point mutant strains from a histone point mutant collection (GE Healthcare, Ref. 1 below). Diploids were isolated on Min-URA containing 100 $\mu$ g/mL of G418 and 150  $\mu$ g/mL clonNAT, sporulated, and haploid double mutants were isolated by tetrad dissection and subsequent selection on Min-URA containing 100ug/mL of G418 and 150 ug/mL clonNAT. The genotypes of the double mutants were confirmed by PCR. See Table S1 for a full list of strains.

To generate the yeast strains for chromatin immunoprecipitation analysis, we transformed Prp42-HA, Lea1-HA, and Snu114-HA with a PCR product encoding the hygromycin<sup>R</sup> cassette flanked by 50 nts of homology to the sites of integration (SET2 5' and 3' UTR; see Table S2 for primer sequences and TableS3 for plasmid used for PCR). Transformants were isolated on YEPD containing 150 $\mu$ g/mL clonNAT. We utilized PCR to confirm the genotype of each strain. See Table S1 for the full list of strains.

1. Dai J, Hyland EM, Yuan DS, Huang H, Bader JS, et al. (2008) Probing nucleosome function: A highly versatile library of synthetic histone H3 and H4 mutants. Cell 134(6): 1066-1078.

### **Whole cell extract preparation and immunoblotting**

To monitor H3K36 methylation status in *set2* mutants, overnight cultures were grown for *set2* mutants in selective medium and it was used to start fresh cultures (starting A<sub>600</sub> 0.1). After growing the cultures to an A<sub>600</sub> 0.6-0.8, cells were centrifuged (13,000 rpm) for 5 min and the cell pellet was lysed by vortexing (for 5-7 min.) using 200  $\mu$ L of SUMEB buffer (1% SDS, 8M Urea, 10mM MOPS, pH 6.8, 10mM EDTA, 0.01% bromophenol blue) and 200  $\mu$ L equivalent of glass beads. The protein extract were centrifuged before loading onto the SDS- PAGE gels.

For immunoblotting, 15% SDS-PAGE gels were run at 200V for about 30 minutes and the gels were transferred using Hoefer semi-dry apparatus (45mA/gels for 1.5hr) onto PVDF membranes. Primary antibodies were incubated overnight in 5% milk and secondary antibody incubation was done at room temperature for an hour. Three washes with 1XTBST were performed after primary and secondary incubations and the blots were developed by ECL-prime (Amersham; RPN 2232). The primary antibodies and their dilutions were: H3K36me1 (Abcam ab9048; 1:1000); H3K36me2 (Active Motif, 39255; 1:1000); H3K36me3 (Abcam ab9050; 1:10,000) and C-terminus H3 (1:5000; Epicypher 13-0001).

To monitor the levels of HA-tagged splicing factors when *SET2* is deleted, the indicated yeast strain cultures were grown at 31°C to OD<sub>585</sub> between 0.25-0.4 and shifted to 37°C for 30 mins. Yeast pellets equivalent to 10 mL of OD<sub>585</sub> = 0.5 were harvested by centrifugation at 3000g for 5 min. Pellets were resuspended in 200µl of protein extraction buffer (10mM Tris pH7.5, 125 mM NaCl, 0.1% Igepal/NP-40, 100 ug/ml of aprotinin, leupeptin, and antipain, and 200 µM PMSF) plus ~50µL of 0.5mM glass beads, and were vortexed 5 x 1 min. intervals with a 30 sec. rest on ice between intervals. Supernatant was isolated by centrifugation at 10,000g for 10 min. The protein extracts (supernatants) were quantified using standard Bradford Assay. Protein extracts (6ug of total protein for Lea1-HA and Snu114-HA strains and 12µg total protein for Prp42-HA strains) was separated on 10% Biorad TGA gel, transferred to nitrocellulose and probed with α-HA (Roche 12CA5, Cat #11583816001) or α-Glucose-6-phosphate dehydrogenase (G-6-PDH; Sigma A9521) using traditional Western Blot technique using ECL detection (Pierce 32132).

**Table S1. Yeast strains used in this study.**

| <b>Name</b> | <b>Genotype</b>                                                                                          | <b>Ref.</b> |
|-------------|----------------------------------------------------------------------------------------------------------|-------------|
| BY4741      | <i>MATa his3Δ1 leu2Δ0 met15Δ0 ura3Δ0</i>                                                                 |             |
| BY4742      | <i>MATα his3Δ1 leu2Δ0 met15Δ0 ura3Δ0</i>                                                                 |             |
| YTK609      | <i>MATα SGA leuΔ0 his3Δ1 LYS2+ met15Δ0 ura3Δ0 can1Δ::STE2pr-SpHIS5 lyp1Δ::STE3pr-LEU3</i>                | 1           |
| YTK846      | <i>MATα SGA leuΔ::NAT his3Δ1 LYS2+ met15Δ0 ura3Δ0 can1Δ::STE2pr-SpHIS5 lyp1Δ::STE3pr-LEU3 cyh-s</i>      | 1           |
| YDC135      | <i>MATα SGA his3Δ::G418 leuΔ0 LYS2+ met15Δ0 ura3Δ0 can1Δ::STE2pr-SpHIS5 lyp1Δ::STE3pr-LEU3 cyh-s</i>     | 1           |
| YDC161      | <i>MATa SGA his3Δ::G418 leuΔ::NAT LYS2+ met15Δ0 ura3Δ0 can1Δ::STE2pr-SpHIS5 lyp1Δ::STE3pr-LEU3 cyh-s</i> | 1           |
| YTK660      | <i>MATα mud1Δ::NAT can1Δ::STE2pr-SpHIS5 lyp1Δ::STE3pr-LEU2 his3Δ1 leu2Δ0 uraΔ0</i>                       | this study  |
| YTK663      | <i>MATα mud2Δ::NAT can1Δ::STE2pr-SpHIS5 lyp1Δ::STE3pr-LEU2 his3Δ1 leu2Δ0 uraΔ0</i>                       | this study  |
| YTK664      | <i>MATα isy1Δ::NAT can1Δ::STE2pr-SpHIS5 lyp1Δ::STE3pr-LEU2 his3Δ1 leu2Δ0 uraΔ0</i>                       | this study  |
| YTK649      | <i>MATα snu66Δ::NAT can1Δ::STE2pr-SpHIS5 lyp1Δ::STE3pr-LEU2 his3Δ1 leu2Δ0 uraΔ0</i>                      | this study  |
| YTK769      | <i>MATα ist3Δ::NAT can1Δ::STE2pr-SpHIS5 lyp1Δ::STE3pr-LEU2 his3Δ1 leu2Δ0 uraΔ0</i>                       | this study  |
|             | <i>MATa jhd1Δ::G418 his3Δ1 leu2Δ0 lys2Δ0 ura3Δ0</i>                                                      | 2           |
|             | <i>MATa set2Δ::G418 his3Δ1 leu2Δ0 lys2Δ0 ura3Δ0</i>                                                      | 2           |
| YTK799      | <i>MATa mud1Δ::NAT set2 Δ::G418 can1Δ::STE2pr-SpHIS5 lyp1Δ::STE3pr-LEU2 his3Δ1 leu2Δ0 uraΔ0</i>          | this study  |
| YTK759      | <i>MATa mud1Δ::NAT set2 Δ::G418 can1Δ::STE2pr-SpHIS5 lyp1Δ::STE3pr-LEU2 his3Δ1 leu2Δ0 uraΔ0</i>          | this study  |
| YTK705      | <i>MATa isy1Δ::NAT set2 Δ::G418 can1Δ::STE2pr-SpHIS5 lyp1Δ::STE3pr-LEU2 his3Δ1 leu2Δ0 uraΔ0</i>          | this study  |
| YTK800      | <i>MATa snu66Δ::NAT set2 Δ::G418 can1Δ::STE2pr-SpHIS5 lyp1Δ::STE3pr-LEU2 his3Δ1 leu2Δ0 uraΔ0</i>         | this study  |
| YTK841      | <i>MATa ist3Δ::NAT set2 Δ::G418 can1Δ::STE2pr-SpHIS5 lyp1Δ::STE3pr-LEU2 his3Δ1 leu2Δ0 uraΔ0</i>          | this study  |
| YTK743      | <i>MATa mud1Δ::NAT jhd1 Δ::G418 can1Δ::STE2pr-SpHIS5 lyp1Δ::STE3pr-LEU2 his3Δ1 leu2Δ0 uraΔ0</i>          | this study  |
| YTK780      | <i>MATa mud2Δ::NAT jhd1 Δ::G418 can1Δ::STE2pr-SpHIS5 lyp1Δ::STE3pr-LEU2 his3Δ1 leu2Δ0 uraΔ0</i>          | this study  |
| YTK752      | <i>MATa isy1Δ::NAT jhd1 Δ::G418 can1Δ::STE2pr-SpHIS5 lyp1Δ::STE3pr-LEU2 his3Δ1 leu2Δ0 uraΔ0</i>          | this study  |
| YTK754      | <i>MATa snu66Δ::NAT jhd1 Δ::G418 can1Δ::STE2pr-SpHIS5 lyp1Δ::STE3pr-LEU2 his3Δ1 leu2Δ0 uraΔ0</i>         | this study  |
| YTK757      | <i>MATa ist3Δ::NAT jhd1 Δ::G418 can1Δ::STE2pr-SpHIS5 lyp1Δ::STE3pr-LEU2 his3Δ1 leu2Δ0 uraΔ0</i>          | this study  |
|             | <i>MATα mud1Δ::G418 his3Δ1 leu2Δ0 lys2Δ0 ura3Δ0</i>                                                      | 2           |



|                           |                                                                                                                                                                                                                                                                                            |                          |
|---------------------------|--------------------------------------------------------------------------------------------------------------------------------------------------------------------------------------------------------------------------------------------------------------------------------------------|--------------------------|
|                           | <i>hhf1::NatMX4 hht2-hhf2::[H3K36Q-HHFS]*-URA3</i>                                                                                                                                                                                                                                         |                          |
| YTK810                    | <i>ist3Δ::G418 his3Δ leu2Δ0 lys2Δ0 ura3Δ0 can1::MFA1pr-HIS3 hht1-hhf1::NatMX4 hht2-hhf2::[H3K36Q-HHFS]*-URA3</i>                                                                                                                                                                           | this study               |
| YTK828                    | <i>lea1Δ::G418 his3Δ leu2Δ0 lys2Δ0 ura3Δ0 can1::MFA1pr-HIS3 hht1-hhf1::NatMX4 hht2-hhf2::[H3K36Q-HHFS]*-URA3</i>                                                                                                                                                                           | this study               |
| YTK818                    | <i>bud13Δ::G418 his3Δ leu2Δ0 lys2Δ0 ura3Δ0 can1::MFA1pr-HIS3 hht1-hhf1::NatMX4 hht2-hhf2::[H3K36Q-HHFS]*-URA3</i>                                                                                                                                                                          | this study               |
| YGMW187                   | <i>Prp42-HA (HIS3); MATα; ade2-1 can1-100 his3-11 leu2-3 112 trp1-1 ura3-1 (W303)</i>                                                                                                                                                                                                      | 4                        |
| #268                      | <i>LG1/DBP2-GFP (G418) (JG12)/Lea1-HA (TRP); MATα ura3 his3-11 leu-2 112 trp1-1 can1-100 flo8 psi ADE+ GAL+ SSD1+ BUD4 (W303)</i>                                                                                                                                                          | 5                        |
| #302                      | <i>LG1/DBP2-GFP (G418) (JG12)/Snu114-HA (TRP); MATα ura3 his3-11 leu-2 112 trp1-1 can1-100 flo8 psi ADE+ GAL+ SSD1+ BUD4 (W303)</i>                                                                                                                                                        | 5                        |
| YTK847                    | <i>Prp42-HA (HIS3) set2Δ::HYG MATα ade2-1 can1-100 his3-11 leu2-3 112 trp1-1 ura3-1 (W303)</i>                                                                                                                                                                                             | this study               |
| YTK880                    | <i>LG1/DBP2-GFP (G418) (JG12)/Lea1-HA (TRP) set Δ::HYG MATα ura3 his3-11 leu-2 112 trp1-1 can1-100 flo8 psi ADE+ GAL+ SSD1+ BUD4 (W303)</i>                                                                                                                                                | this study               |
| YTK881                    | <i>LG1/DBP2-GFP (G418) (JG12)/Snu114-HA (TRP) set2Δ::HYG MATα ura3 his3-11 leu-2 112 trp1-1 can1-100 flo8 psi ADE+ GAL+ SSD1+ BUD4 (W303)</i>                                                                                                                                              | this study               |
| KLY78                     | <i>MATα his3Δ200 leu2Δ1 lys2-128Δ trp1Δ63 ura3-52 kanMX-GAL1pr-FLO8-HIS3</i>                                                                                                                                                                                                               | gift from Michael Keogh  |
| YSM138                    | <i>MATα his3Δ200 leu2Δ1 lys2-128Δ trp1Δ63 ura3-52 kanMX-GAL1pr-FLO8-HIS3set2Δ::NATMX</i>                                                                                                                                                                                                   | Strahl Lab               |
| <i>set2Δ</i>              | <i>MATα his3Δ0 leu2Δ0 met15Δ0 ura3Δ0 set2Δ::NATMX</i>                                                                                                                                                                                                                                      | 6                        |
| <i>spt16-11 (DY11848)</i> | <i>MATα spt16-11 ade2 can1 his3 leu2 lys2 met15 trp1 ura3 (DY8107)</i>                                                                                                                                                                                                                     | gift from David Stillman |
| <i>spt16-11set2Δ</i>      | <i>MATα spt16-11 set2::HpHMX ade2 can1 his3 leu2 ura3</i>                                                                                                                                                                                                                                  | Strahl Lab               |
|                           |                                                                                                                                                                                                                                                                                            |                          |
| <b>References</b>         |                                                                                                                                                                                                                                                                                            |                          |
| 1                         | strains derived from strains described in Tong A.H.Y., Boone, C. (2006) Synthetic genetic array analysis in <i>Saccharomyces cerevisiae</i> . Methods Mol Biol 313: 171–192. YDC strains a gift from Dale Cameron.                                                                         |                          |
| 2                         | yeast deletion collection from OpenBiosystems (www.openbiosystems.com formerly, Research Genetics, Huntsville AL)                                                                                                                                                                          |                          |
| 3                         | histone point mutant collection from GE Healthcare #YSC5106; as described in Dai, J., Hyland, E.M., Yuan, D.S., Huang, H., Bader, J.S., Boeke, J.D.(2008) Probing nucleosome function: a highly versatile library of synthetic histone H3 and H4 mutants. Cell 2008 Sep 19;134(6):1066-78. |                          |

|   |                                                                                                                                                                                                      |  |
|---|------------------------------------------------------------------------------------------------------------------------------------------------------------------------------------------------------|--|
| 4 | a gift from G. Wilmes and C. Guthrie                                                                                                                                                                 |  |
| 5 | Gornemann, J., Kotovic, K. M., Hujer, K., and Neugebauer, K. M. (2005). Cotranscriptional spliceosome assembly occurs in a stepwise fashion and requires the cap binding complex. Mol Cell 19, 53-63 |  |
| 6 | Deepak K. Jha and Brian D. Strahl; Nature Communications 5, Article number: 3965 doi:10.1038/ncomms4965                                                                                              |  |

**Table S2. Plasmids used in this study.**

| <b>Plasmid</b>          | <b>Description</b>                                               | <b>Assay</b>                                              | <b>Reference</b>                                              |
|-------------------------|------------------------------------------------------------------|-----------------------------------------------------------|---------------------------------------------------------------|
| pAG25 ( <i>natMX4</i> ) | resistance to clonNAT-Nourseothricin                             | to replace G418 with NAT                                  | Goldstein et al Yeast. 1999 Oct;15(14):1541-53.               |
| pAG32 ( <i>hphMX4</i> ) | resistance to hygromycin B                                       | to KO <i>SET2</i>                                         | Goldstein et al Yeast. 1999 Oct;15(14):1541-53.               |
| <i>SET2</i> WT          | WT <i>SET2</i> cloned into pRS416, driven by endogenous promoter | transcriptional assays and rescue of splicing experiments | Du <i>et.al</i> Genes Dev. Oct 15, 2008; 22(20): 2786–2798.   |
| <i>set2 H199L</i>       | QuikChange Mutagenesis of WT <i>SET2</i>                         | transcriptional assays and rescue of splicing experiments | Jha and Strahl, Nature Communications 5, Article number: 3965 |
| <i>set2 R195C</i>       | QuikChange Mutagenesis of WT <i>SET2</i>                         | transcriptional assays and rescue of splicing experiments | this study                                                    |
| <i>set2 K663L</i>       | QuikChange Mutagenesis of WT <i>SET2</i>                         | transcriptional assays and rescue of splicing experiments | this study                                                    |
| <i>set2 H199L K663L</i> | QuikChange Mutagenesis of WT <i>SET2</i>                         | transcriptional assays and rescue of splicing experiments | this study                                                    |
| <i>set2 SRIΔ</i>        | <i>set2 1-618</i> in pRS416                                      | transcriptional assays and rescue of splicing experiments | Du <i>et.al</i> Genes Dev. Oct 15, 2008; 22(20): 2786–2798.   |
| pRS316 Reporter         | <i>GPD</i> -Reporter <i>CEN URA3</i>                             | Gene expression reporter                                  | Sorenson and Stevens, RNA. 2014; 20(5):732-45                 |
| pRS415 Reporter         | <i>GPD</i> -Reporter <i>CEN LEU2</i>                             | Gene expression reporter                                  | Sorenson and Stevens, RNA. 2014; 20(5):732-45                 |



**Table S3. Primers used in this study.**

| <b>Primer name</b>           | <b>Primer Sequence</b>                                                                 | <b>Purpose</b>           | <b>Reference</b> |
|------------------------------|----------------------------------------------------------------------------------------|--------------------------|------------------|
| NatCassetteF                 | ACATGGAGGCCCGAGAATACCC                                                                 | to replace G418 with NAT | this study       |
| NatCassetteR                 | CAGTATAGCGACCAGCATTAC                                                                  | to replace G418 with NAT | this study       |
| Set2KOF                      | CTGCATAGTCGTGCTGTCAAACCTTTCTCCTT<br>TCCTGGTTGTTGTTTTACGTGATCACATGGAG<br>GCCCAGAATACCC  | to KO Set2               | this study       |
| Set2KOR                      | GACTTCCTTTGGGACAGAAAACGTGAAACAAG<br>CCCCAAATATGCATGTCTGGTTAACAGTATAC<br>GCGACCAGCATTCA | to KO Set2               | this study       |
| TEF5intFWDjp<br>qPCR         | GATAGCACAGAGCAGAGTATCATTA                                                              | qPCR                     | this study       |
| TEF5intREVjp qPCR            | CTGGAGAATTCTGGGTAAGCAGATT                                                              | qPCR                     | this study       |
| TEF5 total FWD<br>qPCR       | CCATTGTCACTCTAGATGTCAAGCC                                                              | qPCR                     | this study       |
| TEF5 total REV<br>qPCR       | GATACCGAAACCAATTGGGATAAAT                                                              | qPCR                     | this study       |
| DBP2intFWDms<br>qPCR         | ACAGAATAACGAACCAAATTACTAACAGT                                                          | qPCR                     | this study       |
| DBP2intREVms<br>qPCR         | CCTGGCATATCGTAGTTGATAACG                                                               | qPCR                     | this study       |
| DBP2exonFWDms<br>qPCR        | CTTCACCGAACAACAAAGGTT                                                                  | qPCR                     | this study       |
| DBP2exonREVms<br>qPCR        | TCGGGAGGAATATTTTGATTAGCT                                                               | qPCR                     | this study       |
| SRB2 pre-mRNA<br>FWD qPCR    | GGGAAAATCAGCGTATGTAAAGC                                                                | qPCR                     | this study       |
| SRB2 pre-mRNA<br>REV qPCR    | GAGTGGCTCTTTCCACGAATATAA                                                               | qPCR                     | this study       |
| SRB2 total FWD<br>qPCR       | CATCGAAGGACACCTAGCTGAA                                                                 | qPCR                     | this study       |
| SRB2 total REV<br>qPCR       | TCCGGCCCCAACGAG                                                                        | qPCR                     | this study       |
| RPS21B pre-mRNA<br>FWD qPCR  | CAAATAGGGTGGGACCAACA                                                                   | qPCR                     | this study       |
| RPS21B pre-mRNA<br>REV qPCR  | TCAGGTAACACTTGTGCCAAT                                                                  | qPCR                     | this study       |
| RPS21B total FWD<br>qPCR     | ATCCAGAGGTGAATCCGATG                                                                   | qPCR                     | this study       |
| RPS21B total REV<br>qPCR     | AACGACTTCCCCTCTTCTTTTT                                                                 | qPCR                     | this study       |
| Rps21BIntronF3<br>(Region 1) | TCCGAATTAGTGGGTTTCCA                                                                   | ChIP                     | 1                |
| Rps21BIntronR3<br>(Region 1) | TCAATGTTAGTACATTTGCGCTTA                                                               | ChIP                     | 1                |

|                                                     |                                                                                                                                                                                   |            |            |
|-----------------------------------------------------|-----------------------------------------------------------------------------------------------------------------------------------------------------------------------------------|------------|------------|
| Rps21BintronF1<br>(Region 2)                        | AATCATCAAAGCCGATGACC                                                                                                                                                              | ChIP       | 1          |
| Rps21BintronR1<br>(Region 2)                        | CATCGGATTCACCTCTGGAT                                                                                                                                                              | ChIP       | 1          |
| Rps21bExon2-2<br>(Region 3)                         | ATCCAGAGGTGAATCCGATG                                                                                                                                                              | ChIP       | 1          |
| Rps12b3'UTR-2<br>(Region 3)                         | AACGACTTCCCCTCTTCTTTTT                                                                                                                                                            | ChIP       | 2          |
| IR V-1(intergenic<br>region for Rps21B<br>ChIPs)    | GGCTGTCAGAATATGGGGCCGTAGTA                                                                                                                                                        | ChIP       | 2          |
| IR V-2 (intergenic<br>region for Rps21B<br>ChIPs)   | CACCCCGAAGCTGCTTTCACAATAC                                                                                                                                                         | ChIP       | 2          |
| DBP2 1409 F<br>(Region 1)                           | TGA CAA CCA TGA TAG TAC AGA AGA GAG                                                                                                                                               | ChIP       | 3          |
| DBP2 1558 R<br>(Region 1)                           | TTT CCG ATA CTC CCC ATC G                                                                                                                                                         | ChIP       | 3          |
| DBP2 1877 F<br>(Region 2)                           | ATG CCG TCA TCC TTC TTG AC                                                                                                                                                        | ChIP       | 3          |
| DBP2 1970 R<br>(Region 2)                           | TCG AAC TTG GGA TGC AAC AG                                                                                                                                                        | ChIP       | 3          |
| DBP2 2392 F<br>(Region 3)                           | TTC ACC GAA CAA AAC AAA GG                                                                                                                                                        | ChIP       | 3          |
| DBP2 2612 R<br>(Region 3)                           | CCA CCA TCT CTC TGC CTG TT                                                                                                                                                        | ChIP       | 3          |
| NTR VI_R F<br>(intergenic region for<br>Dbp2 ChIPs) | CAG GCA GTC CTT TCT ATT TC                                                                                                                                                        | ChIP       | 3          |
| NTR VI_R R<br>(intergenic region for<br>Dbp2 ChIPs) | GCT TGT TAA CTC TCC GAC AG                                                                                                                                                        | ChIP       | 3          |
| R195C F                                             | CTGCAAGAGTGATTGCAAAAGCAGGCCAACG<br>AACCCTTTATTG                                                                                                                                   | QuikChange | this study |
| R195C R                                             | CAATAAAGGGTTGTTGGCCTGCTTTTGCAAT<br>CACTCTTGCAAG                                                                                                                                   | QuikChange | this study |
| K663L F                                             | GTAGTTAGGATTTTCACGATGTCTAAAGCACA<br>TTGTTTAATGTTTTTCATGATC                                                                                                                        | QuikChange | this study |
| K663L R                                             | GATCATGAAAACATTAAACAATGTGCTTTAGA<br>CATCGTGAAAATCCTAACTAC                                                                                                                         | QuikChange | this study |
|                                                     |                                                                                                                                                                                   |            |            |
| <b>References</b>                                   |                                                                                                                                                                                   |            |            |
| 1                                                   | Tracy L. Kress, Nevan J. Krogan, and Christine Guthrie (2008). A single SR-like protein, Npl3, promotes pre-mRNA                                                                  |            |            |
| 2                                                   | Komarnitsky, P, Cho, E.J. and Buratowski, S. (2000). Different phosphorylated forms of RNA polymerase II and associated mRNA processing factors during transcription. Genes. Dev. |            |            |

|   |                                                                                                                 |  |  |
|---|-----------------------------------------------------------------------------------------------------------------|--|--|
|   | 14(19):2452-60.                                                                                                 |  |  |
| 3 | Gunderson FQ, Johnson TL. (2009). Acetylation by the transcriptional coactivator Gcn5 plays a novel role in co- |  |  |

**Table S4. Tukey method p-values for Figure 3.**

| Gene analyzed by RT-qPCR | Treatment Pair   | p-value   |
|--------------------------|------------------|-----------|
| <b><i>DBP2</i></b>       | WT vs snu66Δ     | 0.0010053 |
|                          | WT vs set2Δ      | 0.0010053 |
|                          | WT vs jhd1Δ      | 0.0010053 |
|                          | WT vs H3K36A     | 0.001384  |
|                          | WT vs H3K36Q     | 0.0217177 |
|                          | WT vs H3 K36R    | 0.2046892 |
|                          | snu66Δ vs set2Δ  | 0.0010053 |
|                          | snu66Δ vs jhd1Δ  | 0.0010053 |
|                          | snu66Δ vs H3K36A | 0.0010053 |
|                          | snu66Δ vs H3K36Q | 0.0010053 |
|                          | snu66Δ vs H3K36R | 0.0010053 |
|                          | set2Δ vs H3K36A  | 0.0010053 |
|                          | set2Δ vs H3K36Q  | 0.0010053 |
|                          | set2Δ vs H3K36R  | 0.0010053 |
|                          | jhd1Δ vs H3K36A  | 0.8999947 |
|                          | jhd1Δ vs H3K36Q  | 0.3693971 |
|                          | jhd1Δ vs H3K36R  | 0.0454708 |
|                          | H3K36A vs H3K36Q | 0.7020738 |
|                          | H3K36A vs H3K36R | 0.1364809 |
|                          | H3K36Q vs H3K36R | 0.8233492 |
| <b><i>SRB2</i></b>       | WT vs snu66Δ     | 0.0010053 |
|                          | WT vs set2Δ      | 0.0010053 |
|                          | WT vs jhd1Δ      | 0.8999947 |
|                          | WT vs H3K36A     | 0.0010053 |
|                          | WT vs H3K36Q     | 0.0010053 |
|                          | WT vs H3 K36R    | 0.0010053 |
|                          | snu66Δ vs set2Δ  | 0.0010053 |
|                          | snu66Δ vs jhd1Δ  | 0.0010053 |
|                          | snu66Δ vs H3K36A | 0.0277639 |
|                          | snu66Δ vs H3K36Q | 0.0158005 |
|                          | snu66Δ vs H3K36R | 0.0422296 |
|                          | set2Δ vs H3K36A  | 0.0010053 |
|                          | set2Δ vs H3K36Q  | 0.0010053 |
|                          | set2Δ vs H3K36R  | 0.0010053 |
|                          | jhd1Δ vs H3K36A  | 0.0010053 |
|                          | jhd1Δ vs H3K36Q  | 0.0010053 |
|                          | jhd1Δ vs H3K36R  | 0.0010053 |

|               |                  |           |
|---------------|------------------|-----------|
|               | H3K36A vs H3K36Q | 0.8999947 |
|               | H3K36A vs H3K36R | 0.8999947 |
|               | H3K36Q vs H3K36R | 0.8999947 |
| <b>RPS21B</b> | WT vs snu66Δ     | 0.0010053 |
|               | WT vs set2Δ      | 0.0010053 |
|               | WT vs jhd1Δ      | 0.8999947 |
|               | WT vs H3K36A     | 0.5746997 |
|               | WT vs H3K36Q     | 0.0010053 |
|               | WT vs H3 K36R    | 0.0869973 |
|               | snu66Δ vs set2Δ  | 0.0379223 |
|               | snu66Δ vs jhd1Δ  | 0.0010053 |
|               | snu66Δ vs H3K36A | 0.0010053 |
|               | snu66Δ vs H3K36Q | 0.0049439 |
|               | snu66Δ vs H3K36R | 0.0010053 |
|               | set2Δ vs H3K36A  | 0.0010053 |
|               | set2Δ vs H3K36Q  | 0.8999947 |
|               | set2Δ vs H3K36R  | 0.0037169 |
|               | jhd1Δ vs H3K36A  | 0.2877402 |
|               | jhd1Δ vs H3K36Q  | 0.0010053 |
|               | jhd1Δ vs H3K36R  | 0.0314379 |
|               | H3K36A vs H3K36Q | 0.0025908 |
|               | H3K36A vs H3K36R | 0.8103717 |
|               | H3K36Q vs H3K36R | 0.0284683 |
| <b>TEF5</b>   | WT vs snu66Δ     | 0.0010053 |
|               | WT vs set2Δ      | 0.8999947 |
|               | WT vs jhd1Δ      | 0.8999947 |
|               | WT vs H3K36A     | 0.8141013 |
|               | WT vs H3K36Q     | 0.2261035 |
|               | WT vs H3 K36R    | 0.0989161 |
|               | snu66Δ vs set2Δ  | 0.0010053 |
|               | snu66Δ vs jhd1Δ  | 0.0010053 |
|               | snu66Δ vs H3K36A | 0.0010053 |
|               | snu66Δ vs H3K36Q | 0.0010053 |
|               | snu66Δ vs H3K36R | 0.0010053 |
|               | set2Δ vs HK36A   | 0.8999947 |
|               | set2Δ vs H3K36Q  | 0.363122  |
|               | set2Δ vs H3K36R  | 0.1711983 |
|               | jhd1Δ vs H3K36A  | 0.8999947 |
|               | jhd1Δ vs H3K36Q  | 0.349774  |
|               | jhd1Δ vs H3K36R  | 0.1638143 |
|               | H3K36A vs H3K36Q | 0.8774383 |
|               | H3K36A vs H3K36R | 0.6105911 |
|               | H3K36Q vs H3K36R | 0.8999947 |

Table S5. Tukey method p-values for Figure 4.

| Mud1 Double Mutants  |                      |                     |  |                      |                     |
|----------------------|----------------------|---------------------|--|----------------------|---------------------|
| Gene Analyzed by PCR | treatments pair      | Tukey HSD inference |  | treatments pair      | Tukey HSD inference |
| SRB2                 | WT vs mud1Δ          | 0.0016635           |  | WT vs mud1Δ          | 0.0010053           |
|                      | WT vs set2Δ          | 0.0241081           |  | WT vs jhd1Δ          | 0.8999947           |
|                      | WT vs set2Δ mud1Δ    | 4.43E-05            |  | WT vs jhd1Δ mud1Δ    | 0.0290273           |
|                      | mud1Δ vs set2Δ       | 0.2250149           |  | mud1Δ vs jhd1Δ       | 0.0010053           |
|                      | mud1Δ vs set2Δ mud1Δ | 0.0179447           |  | mud1Δ vs jhd1Δ mud1Δ | 0.0707268           |
|                      | set2Δ vs set2Δ mud1Δ | 0.0013105           |  | jhd1Δ vs jhd1Δ mud1Δ | 0.03731             |
|                      |                      |                     |  |                      |                     |
| DBP2                 | WT vs mud1Δ          | 0.7834077           |  | WT vs mud1Δ          | 0.836575            |
|                      | WT vs set2Δ          | 0.0010053           |  | WT vs jhd1Δ          | 0.0010053           |
|                      | WT vs set2Δ mud1Δ    | 0.4940669           |  | WT vs jhd1Δ mud1Δ    | 0.5366688           |
|                      | mud1Δ vs set2Δ       | 0.0010053           |  | mud1Δ vs jhd1Δ       | 0.0010053           |
|                      | mud1Δ vs set2Δ mud1Δ | 0.1585598           |  | mud1Δ vs jhd1Δ mud1Δ | 0.2045859           |
|                      | set2Δ vs set2Δ mud1Δ | 0.0010053           |  | jhd1Δ vs jhd1Δ mud1Δ | 0.0019992           |
|                      |                      |                     |  |                      |                     |
| RPS21B               | WT vs mud1Δ          | 0.1997401           |  | WT vs mud1Δ          | 0.5283174           |
|                      | WT vs set2Δ          | 0.0010053           |  | WT vs jhd1Δ          | 0.8999947           |
|                      | WT vs set2Δ mud1Δ    | 0.209323            |  | WT vs jhd1Δ mud1Δ    | 0.326054            |
|                      | mud1Δ vs set2Δ       | 0.0010053           |  | mud1Δ vs jhd1Δ       | 0.7110421           |
|                      | mud1Δ vs set2Δ mud1Δ | 0.0099871           |  | mud1Δ vs jhd1Δ mud1Δ | 0.0474535           |
|                      | set2Δ vs set2Δ mud1Δ | 0.0022707           |  | jhd1Δ vs jhd1Δ mud1Δ | 0.2054051           |
|                      |                      |                     |  |                      |                     |
| TEF5                 | WT vs mud1Δ          | 0.8067788           |  | WT vs mud1Δ          | 0.8999947           |
|                      | WT vs set2Δ          | 0.8999947           |  | WT vs jhd1Δ          | 0.8999947           |
|                      | WT vs set2Δ mud1Δ    | 0.0010298           |  | WT vs jhd1Δ mud1Δ    | 0.4495094           |
|                      | mud1Δ vs set2Δ       | 0.8999947           |  | mud1Δ vs jhd1Δ       | 0.8999947           |
|                      | mud1Δ vs set2Δ mud1Δ | 0.0026851           |  | mud1Δ vs jhd1Δ mud1Δ | 0.7211679           |
|                      | set2Δ vs set2Δ mud1Δ | 0.0014761           |  | jhd1Δ vs jhd1Δ mud1Δ | 0.5448331           |
|                      |                      |                     |  |                      |                     |

| Mud2 Double Mutants  |                      |                     |  |                      |                     |
|----------------------|----------------------|---------------------|--|----------------------|---------------------|
| Gene Analyzed by PCR | treatments pair      | Tukey HSD inference |  | treatments pair      | Tukey HSD inference |
| SRB2                 | WT vs mud2Δ          | 0.0010053           |  | WT vs mud2Δ          | 0.0010053           |
|                      | WT vs set2Δ          | 0.0010053           |  | WT vs jhd1Δ          | 0.8999947           |
|                      | WT vs set2Δ mud2Δ    | 0.0010053           |  | WT vs jhd1Δ mud2Δ    | 0.0010053           |
|                      | mud2Δ vs set2Δ       | 0.0010053           |  | mud2Δ vs jhd1Δ       | 0.0010053           |
|                      | mud2Δ vs set2Δ mud2Δ | 0.0036492           |  | mud2Δ vs jhd1Δ mud2Δ | 0.3569099           |
|                      | set2Δ vs set2Δ mud2Δ | 0.0010053           |  | jhd1Δ vs jhd1Δ mud2Δ | 0.0010053           |
|                      |                      |                     |  |                      |                     |
| DBP2                 | WT vs mud2Δ          | 0.098157            |  | WT vs mud2Δ          | 0.052297            |
|                      | WT vs set2Δ          | 0.0010053           |  | WT vs jhd1Δ          | 0.0010053           |
|                      | WT vs set2Δ mud2Δ    | 0.0010053           |  | WT vs jhd1Δ mud2Δ    | 0.1307498           |
|                      | mud2Δ vs set2Δ       | 0.0010053           |  | mud2Δ vs jhd1Δ       | 0.0205863           |

|               |                      |           |  |                      |           |
|---------------|----------------------|-----------|--|----------------------|-----------|
|               | mud2Δ vs set2Δ mud2Δ | 0.0010053 |  | mud2Δ vs jhd1Δ mud2Δ | 0.8999947 |
|               | set2Δ vs set2Δ mud2Δ | 0.8450478 |  | jhd1Δ vs jhd1Δ mud2Δ | 0.0087079 |
|               |                      |           |  |                      |           |
| <b>RPS21B</b> | WT vs mud2Δ          | 0.0010053 |  | WT vs mud2Δ          | 0.0010053 |
|               | WT vs set2Δ          | 0.0010053 |  | WT vs jhd1Δ          | 0.8999947 |
|               | WT vs set2Δ mud2Δ    | 0.0010053 |  | WT vs jhd1Δ mud2Δ    | 0.0010053 |
|               | mud2Δ vs set2Δ       | 0.0010053 |  | mud2Δ vs jhd1Δ       | 0.0010053 |
|               | mud2Δ vs set2Δ mud2Δ | 0.6953979 |  | mud2Δ vs jhd1Δ mud2Δ | 0.1689675 |
|               | set2Δ vs set2Δ mud2Δ | 0.0010053 |  | jhd1Δ vs jhd1Δ mud2Δ | 0.0010053 |
|               |                      |           |  |                      |           |
| <b>TEF5</b>   | WT vs mud2Δ          | 0.8653558 |  | WT vs mud2Δ          | 0.8512294 |
|               | WT vs set2Δ          | 0.8999947 |  | WT vs jhd1Δ          | 0.8999947 |
|               | WT vs set2Δ mud2Δ    | 0.8999947 |  | WT vs jhd1Δ mud2Δ    | 0.0166449 |
|               | mud2Δ vs set2Δ       | 0.8999947 |  | mud2Δ vs jhd1Δ       | 0.8999947 |
|               | mud2Δ vs set2Δ mud2Δ | 0.7112306 |  | mud2Δ vs jhd1Δ mud2Δ | 0.0484181 |
|               | set2Δ vs set2Δ mud2Δ | 0.8999947 |  | jhd1Δ vs jhd1Δ mud2Δ | 0.0241283 |

### Snu66 Double Mutants

| Gene Analyzed by PCR | treatments pair       | Tukey HSD inference |  | treatments pair        | Tukey HSD inference |
|----------------------|-----------------------|---------------------|--|------------------------|---------------------|
| <b>SRB2</b>          | WT vs snu66Δ          | 0.0010053           |  | WT vs snu66Δ           | 0.0010053           |
|                      | WT vs set2Δ           | 0.0010053           |  | WT vs jhd1Δ            | 0.0108833           |
|                      | WT vs set2Δ snu66Δ    | 0.0808001           |  | WT vs jhd1Δ snu66Δ     | 0.0010053           |
|                      | snu66Δ vs set2Δ       | 0.0319482           |  | snu66Δ vs jhd1Δ        | 0.0010053           |
|                      | snu66Δ vs set2Δ mud2Δ | 0.0010053           |  | snu66Δ vs jhd1Δ snu66Δ | 0.0414419           |
|                      | set2Δ vs set2Δ snu66Δ | 0.0047228           |  | jhd1Δ vs jhd1Δ snu66Δ  | 0.0010053           |
|                      |                       |                     |  |                        |                     |
| <b>DBP2</b>          | WT vs snu66Δ          | 0.0010053           |  | WT vs snu66Δ           | 0.0010053           |
|                      | WT vs set2Δ           | 0.0010053           |  | WT vs jhd1Δ            | 0.0108833           |
|                      | WT vs set2Δ snu66Δ    | 0.8999947           |  | WT vs jhd1Δ snu66Δ     | 0.0010053           |
|                      | snu66Δ vs set2Δ       | 0.0010053           |  | snu66Δ vs jhd1Δ        | 0.0010053           |
|                      | snu66Δ vs set2Δ mud2Δ | 0.0010053           |  | snu66Δ vs jhd1Δ snu66Δ | 0.0414419           |
|                      | set2Δ vs set2Δ snu66Δ | 0.0010053           |  | jhd1Δ vs jhd1Δ snu66Δ  | 0.0010053           |
|                      |                       |                     |  |                        |                     |
| <b>RPS21B</b>        | WT vs snu66Δ          | 0.0010053           |  | WT vs snu66Δ           | 0.0010053           |
|                      | WT vs set2Δ           | 0.0010053           |  | WT vs jhd1Δ            | 0.8999947           |
|                      | WT vs set2Δ snu66Δ    | 0.1360852           |  | WT vs jhd1Δ snu66Δ     | 0.0010053           |
|                      | snu66Δ vs set2Δ       | 0.0113201           |  | snu66Δ vs jhd1Δ        | 0.0010053           |
|                      | snu66Δ vs set2Δ mud2Δ | 0.0010053           |  | snu66Δ vs jhd1Δ snu66Δ | 0.0010053           |
|                      | set2Δ vs set2Δ snu66Δ | 0.0038235           |  | jhd1Δ vs jhd1Δ snu66Δ  | 0.0010053           |
|                      |                       |                     |  |                        |                     |
| <b>TEF5</b>          | WT vs snu66Δ          | 0.0010053           |  | WT vs snu66Δ           | 0.0010053           |
|                      | WT vs set2Δ           | 0.8999947           |  | WT vs jhd1Δ            | 0.8999947           |
|                      | WT vs set2Δ snu66Δ    | 0.7824861           |  | WT vs jhd1Δ snu66Δ     | 0.0010053           |
|                      | snu66Δ vs set2Δ       | 0.0010053           |  | snu66Δ vs jhd1Δ        | 0.0010053           |
|                      | snu66Δ vs set2Δ mud2Δ | 0.0010053           |  | snu66Δ vs jhd1Δ snu66Δ | 0.7704008           |
|                      | set2Δ vs set2Δ snu66Δ | 0.8999947           |  | jhd1Δ vs jhd1Δ snu66Δ  | 0.0010053           |

## Isy1 Double Mutants

| Gene Analyzed by PCR | treatments pair        | Tukey HSD inference        | treatments pair      | Tukey HSD inference |
|----------------------|------------------------|----------------------------|----------------------|---------------------|
| <b>SRB2</b>          | WT vs isy1Δ            | 0.0037442                  | WT vs isy1Δ          | 0.0014073           |
|                      | WT vs set2Δ            | 0.0031746                  | WT vs jhd1Δ          | 0.8999947           |
|                      | WT vs set2Δ isy1Δ      | 0.0010053                  | WT vs jhd1Δ isy1Δ    | 0.0010053           |
|                      | ist3Δ vs set2Δ         | 0.8999947                  | isy1Δ vs jhd1Δ       | 0.0018982           |
|                      | isy1Δ vs set2Δ isy1Δ   | 0.0010053                  | ist3Δ vs jhd1Δ isy1Δ | 0.2494461           |
|                      | set2Δ vs set2Δ isy1Δ   | 0.0010053                  | jhd1Δ vs jhd1Δ isy1Δ | 0.0010053           |
|                      |                        |                            |                      |                     |
| <b>DBP2</b>          | WT vs isy1Δ            | 0.0010053                  | WT vs isy1Δ          | 0.0010053           |
|                      | WT vs set2Δ            | 0.0010053                  | WT vs jhd1Δ          | 0.0010053           |
|                      | WT vs set2Δ isy1Δ      | 0.0010053                  | WT vs jhd1Δ isy1Δ    | 0.0010053           |
|                      | ist3Δ vs set2Δ         | 0.0288801                  | isy1Δ vs jhd1Δ       | 0.204883            |
|                      | isy1Δ vs set2Δ isy1Δ   | 0.0147621                  | ist3Δ vs jhd1Δ isy1Δ | 0.0172546           |
|                      | set2Δ vs set2Δ isy1Δ   | 0.8999947                  | jhd1Δ vs jhd1Δ isy1Δ | 0.001215            |
|                      |                        |                            |                      |                     |
| <b>RPS21B</b>        | WT vs isy1Δ            | 0.0308132                  | WT vs isy1Δ          | 0.037765            |
|                      | WT vs set2Δ            | 0.0010053                  | WT vs jhd1Δ          | 0.8999947           |
|                      | WT vs set2Δ isy1Δ      | 0.0010053                  | WT vs jhd1Δ isy1Δ    | 0.0010053           |
|                      | ist3Δ vs set2Δ         | 0.0031282                  | isy1Δ vs jhd1Δ       | 0.0162793           |
|                      | isy1Δ vs set2Δ isy1Δ   | 0.0010053                  | ist3Δ vs jhd1Δ isy1Δ | 0.0010053           |
|                      | set2Δ vs set2Δ isy1Δ   | 0.0059715                  | jhd1Δ vs jhd1Δ isy1Δ | 0.0010053           |
|                      |                        |                            |                      |                     |
| <b>TEF5</b>          | WT vs isy1Δ            | 0.0067635                  | WT vs isy1Δ          | 0.0032055           |
|                      | WT vs set2Δ            | 0.8999947                  | WT vs jhd1Δ          | 0.8999947           |
|                      | WT vs set2Δ isy1Δ      | 0.0010053                  | WT vs jhd1Δ isy1Δ    | 0.0013782           |
|                      | ist3Δ vs set2Δ         | 0.0045848                  | isy1Δ vs jhd1Δ       | 0.0021983           |
|                      | isy1Δ vs set2Δ isy1Δ   | 0.2210652                  | ist3Δ vs jhd1Δ isy1Δ | 0.8672439           |
|                      | set2Δ vs set2Δ isy1Δ   | 0.0010053                  | jhd1Δ vs jhd1Δ isy1Δ | 0.0010053           |
|                      |                        |                            |                      |                     |
|                      | <b>treatments pair</b> | <b>Tukey HSD inference</b> |                      |                     |
| <b>SRB2</b>          | WT vs isy1Δ            | 0.0263576                  |                      |                     |
|                      | WT vs H3K36Q           | 0.0010053                  |                      |                     |
|                      | WT vs H3K36Q isy1Δ     | 0.0010053                  |                      |                     |
|                      | isy1Δ vs H3K36Q        | 0.0010053                  |                      |                     |
|                      | isy1Δ vs H3K36Q isy1Δ  | 0.0010053                  |                      |                     |
|                      | H3K36Q vs H3K36Q isy1Δ | 0.0057477                  |                      |                     |
|                      |                        |                            |                      |                     |
| <b>DBP2</b>          | WT vs isy1Δ            | 0.0010053                  |                      |                     |
|                      | WT vs H3K36Q           | 0.044221                   |                      |                     |
|                      | WT vs H3K36Q isy1Δ     | 0.0010053                  |                      |                     |
|                      | isy1Δ vs H3K36Q        | 0.0422947                  |                      |                     |
|                      | isy1Δ vs H3K36Q isy1Δ  | 0.0010053                  |                      |                     |
|                      | H3K36Q vs H3K36Q isy1Δ | 0.0010053                  |                      |                     |
|                      |                        |                            |                      |                     |
| <b>RPS21B</b>        | WT vs isy1Δ            | 0.208539                   |                      |                     |
|                      | WT vs H3K36Q           | 0.0068671                  |                      |                     |

|             |                        |           |
|-------------|------------------------|-----------|
|             | WT vs H3K36Q isy1Δ     | 0.0021351 |
|             | isy1Δ vs H3K36Q        | 0.1340588 |
|             | isy1Δ vs H3K36Q isy1Δ  | 0.0340221 |
|             | H3K36Q vs H3K36Q isy1Δ | 0.7485035 |
|             |                        |           |
| <b>TEF5</b> | WT vs isy1Δ            | 0.0252424 |
|             | WT vs H3K36Q           | 0.3093574 |
|             | WT vs H3K36Q isy1Δ     | 0.2090694 |
|             | isy1Δ vs H3K36Q        | 0.0023575 |
|             | isy1Δ vs H3K36Q isy1Δ  | 0.4725264 |
|             | H3K36Q vs H3K36Q isy1Δ | 0.0155053 |

| <b>Ist3 Double Mutants</b>  |                        |                            |  |                        |                            |
|-----------------------------|------------------------|----------------------------|--|------------------------|----------------------------|
| <b>Gene Analyzed by PCR</b> | <b>treatments pair</b> | <b>Tukey HSD inference</b> |  | <b>treatments pair</b> | <b>Tukey HSD inference</b> |
| <b>SRB2</b>                 | WT vs ist3Δ            | 0.0010053                  |  | WT vs ist3Δ            | 0.0010053                  |
|                             | WT vs set2Δ            | 0.0010053                  |  | WT vs jhd1Δ            | 0.8999947                  |
|                             | WT vs set2Δ ist3Δ      | 0.0010053                  |  | WT vs jhd1Δ ist3Δ      | 0.0010053                  |
|                             | ist3Δ vs set2Δ         | 0.0010053                  |  | ist3Δ vs jhd1Δ         | 0.0010053                  |
|                             | ist3Δ vs set2Δ ist3Δ   | 0.0010053                  |  | ist3Δ vs jhd1Δ ist3Δ   | 0.3523022                  |
|                             | set2Δ vs set2Δ ist3Δ   | 0.0010053                  |  | jhd1Δ vs jhd1Δ ist3Δ   | 0.0010053                  |
|                             |                        |                            |  |                        |                            |
| <b>DBP2</b>                 | WT vs ist3Δ            | 0.0010053                  |  | WT vs ist3Δ            | 0.0010053                  |
|                             | WT vs set2Δ            | 0.0010053                  |  | WT vs jhd1Δ            | 0.0775604                  |
|                             | WT vs set2Δ ist3Δ      | 0.0010053                  |  | WT vs jhd1Δ ist3Δ      | 0.0010053                  |
|                             | ist3Δ vs set2Δ         | 0.0010053                  |  | ist3Δ vs jhd1Δ         | 0.0010053                  |
|                             | ist3Δ vs set2Δ ist3Δ   | 0.0105361                  |  | ist3Δ vs jhd1Δ ist3Δ   | 0.0038239                  |
|                             | set2Δ vs set2Δ ist3Δ   | 0.0010053                  |  | jhd1Δ vs jhd1Δ ist3Δ   | 0.0010053                  |
|                             |                        |                            |  |                        |                            |
| <b>RPS21B</b>               | WT vs ist3Δ            | 0.0010053                  |  | WT vs ist3Δ            | 0.0010053                  |
|                             | WT vs set2Δ            | 0.0012042                  |  | WT vs jhd1Δ            | 0.8999947                  |
|                             | WT vs set2Δ ist3Δ      | 0.0010053                  |  | WT vs jhd1Δ ist3Δ      | 0.0010053                  |
|                             | ist3Δ vs set2Δ         | 0.0010053                  |  | ist3Δ vs jhd1Δ         | 0.0010053                  |
|                             | ist3Δ vs set2Δ ist3Δ   | 0.4150881                  |  | ist3Δ vs jhd1Δ ist3Δ   | 0.8999947                  |
|                             | set2Δ vs set2Δ ist3Δ   | 0.0010053                  |  | jhd1Δ vs jhd1Δ ist3Δ   | 0.0010053                  |
|                             |                        |                            |  |                        |                            |
| <b>TEF5</b>                 | WT vs ist3Δ            | 0.0010053                  |  | WT vs ist3Δ            | 0.0010053                  |
|                             | WT vs set2Δ            | 0.8999947                  |  | WT vs jhd1Δ            | 0.8999947                  |
|                             | WT vs set2Δ ist3Δ      | 0.0010053                  |  | WT vs jhd1Δ ist3Δ      | 0.0010053                  |
|                             | ist3Δ vs set2Δ         | 0.0010053                  |  | ist3Δ vs jhd1Δ         | 0.0010053                  |
|                             | ist3Δ vs set2Δ ist3Δ   | 0.0017769                  |  | ist3Δ vs jhd1Δ ist3Δ   | 0.0010053                  |
|                             | set2Δ vs set2Δ ist3Δ   | 0.0010053                  |  | jhd1Δ vs jhd1Δ ist3Δ   | 0.0010053                  |
|                             |                        |                            |  |                        |                            |
|                             | <b>treatments pair</b> | <b>Tukey HSD inference</b> |  | <b>treatments pair</b> | <b>Tukey HSD inference</b> |
| <b>SRB2</b>                 | WT vs ist3Δ            | 0.0010053                  |  | WT vs ist3Δ            | 0.0010053                  |
|                             | WT vs H3K36A           | 0.0010053                  |  | WT vs H3K36R           | 0.0010053                  |



|               |                        |           |  |                        |           |
|---------------|------------------------|-----------|--|------------------------|-----------|
|               | WT vs H3K36A ist3Δ     | 0.0010053 |  | WT vs H3K36R ist3Δ     | 0.0010053 |
|               | ist3Δ vs H3K36A        | 0.0010053 |  | ist3Δ vs H3K36R        | 0.0010053 |
|               | ist3Δ vs H3K36A ist3Δ  | 0.0015547 |  | ist3Δ vs H3K36R ist3Δ  | 0.0010053 |
|               | H3K36A vs H3K36A ist3Δ | 0.0010053 |  | H3K36R vs H3K36R ist3Δ | 0.0010053 |
|               |                        |           |  |                        |           |
| <b>DBP2</b>   | WT vs ist3Δ            | 0.0010053 |  | WT vs ist3Δ            | 0.0010053 |
|               | WT vs H3K36A           | 0.044451  |  | WT vs H3K36R           | 0.1887671 |
|               | WT vs H3K36A ist3Δ     | 0.0010053 |  | WT vs H3K36R ist3Δ     | 0.0010053 |
|               | ist3Δ vs H3K36A        | 0.0010053 |  | ist3Δ vs H3K36R        | 0.0010053 |
|               | ist3Δ vs H3K36A ist3Δ  | 0.0012431 |  | ist3Δ vs H3K36R ist3Δ  | 0.0010053 |
|               | H3K36A vs H3K36A ist3Δ | 0.0010053 |  | H3K36R vs H3K36R ist3Δ | 0.0010053 |
|               |                        |           |  |                        |           |
| <b>RPS21B</b> | WT vs ist3Δ            | 0.0010053 |  | WT vs ist3Δ            | 0.0010053 |
|               | WT vs H3K36A           | 0.4415016 |  | WT vs H3K36R           | 0.4022168 |
|               | WT vs H3K36A ist3Δ     | 0.0010053 |  | WT vs H3K36R ist3Δ     | 0.0010053 |
|               | ist3Δ vs H3K36A        | 0.0010053 |  | ist3Δ vs H3K36R        | 0.0010053 |
|               | ist3Δ vs H3K36A ist3Δ  | 0.3698207 |  | ist3Δ vs H3K36R ist3Δ  | 0.0129043 |
|               | H3K36A vs H3K36A ist3Δ | 0.0010053 |  | H3K36R vs H3K36R ist3Δ | 0.0010053 |
|               |                        |           |  |                        |           |
| <b>TEF5</b>   | WT vs ist3Δ            | 0.0010053 |  | WT vs ist3Δ            | 0.0010053 |
|               | WT vs H3K36A           | 0.865004  |  | WT vs H3K36R           | 0.1619295 |
|               | WT vs H3K36A ist3Δ     | 0.0010053 |  | WT vs H3K36R ist3Δ     | 0.0010053 |
|               | ist3Δ vs H3K36A        | 0.0010053 |  | ist3Δ vs H3K36R        | 0.0010053 |
|               | ist3Δ vs H3K36A ist3Δ  | 0.0062069 |  | ist3Δ vs H3K36R ist3Δ  | 0.0772512 |
|               | H3K36A vs H3K36A ist3Δ | 0.0010053 |  | H3K36R vs H3K36R ist3Δ | 0.0010053 |

| <b>Bud13 Double Mutants</b> |                         |                            |
|-----------------------------|-------------------------|----------------------------|
| <b>Gene Analyzed by PCR</b> | <b>treatments pair</b>  | <b>Tukey HSD inference</b> |
| <b>SRB2</b>                 | WT vs bud13Δ            | 0.0010053                  |
|                             | WT vs H3K36Q            | 0.0010053                  |
|                             | WT vs H3K36Q bud13Δ     | 0.0010053                  |
|                             | bud13Δ vs H3K36Q        | 0.0010053                  |
|                             | bud13Δ vs H3K36Q bud13Δ | 0.3137478                  |
|                             | H3K36Q vs H3K36Q bud13Δ | 0.0010053                  |
|                             |                         |                            |
| <b>DBP2</b>                 | WT vs bud13Δ            | 0.0010053                  |
|                             | WT vs H3K36Q            | 0.3325522                  |
|                             | WT vs H3K36Q bud13Δ     | 0.0010053                  |
|                             | bud13Δ vs H3K36Q        | 0.0010053                  |
|                             | bud13Δ vs H3K36Q bud13Δ | 0.0010053                  |
|                             | H3K36Q vs H3K36Q bud13Δ | 0.0010053                  |
|                             |                         |                            |
| <b>RPS21B</b>               | WT vs bud13Δ            | 0.0010053                  |
|                             | WT vs H3K36Q            | 0.0158861                  |

|             |                         |           |
|-------------|-------------------------|-----------|
|             | WT vs H3K36Q bud13Δ     | 0.0010053 |
|             | bud13Δ vs H3K36Q        | 0.0045448 |
|             | bud13Δ vs H3K36Q bud13Δ | 0.1619283 |
|             | H3K36Q vs H3K36Q bud13Δ | 0.0010053 |
|             |                         |           |
| <b>TEF5</b> | WT vs bud13Δ            | 0.0010053 |
|             | WT vs H3K36Q            | 0.1497131 |
|             | WT vs H3K36Q bud13Δ     | 0.0010053 |
|             | bud13Δ vs H3K36Q        | 0.0010053 |
|             | bud13Δ vs H3K36Q bud13Δ | 0.0038312 |
|             | H3K36Q vs H3K36Q bud13Δ | 0.0010053 |

| <b>Lea1 Double Mutants</b>  |                        |                            |
|-----------------------------|------------------------|----------------------------|
| <b>Gene Analyzed by PCR</b> | <b>treatments pair</b> | <b>Tukey HSD inference</b> |
| <b>SRB2</b>                 | WT vs lea1Δ            | 0.0010053                  |
|                             | WT vs H3K36R           | 0.0010053                  |
|                             | WT vs H3K36R lea1Δ     | 0.0010053                  |
|                             | ist3Δ vs H3K36R        | 0.0010053                  |
|                             | lea1Δ vs H3K36R lea1Δ  | 0.0249444                  |
|                             | H3K36R vs H3K36R lea1Δ | 0.0010053                  |
|                             |                        |                            |
| <b>DBP2</b>                 | WT vs lea1Δ            | 0.0010053                  |
|                             | WT vs H3K36R           | 0.1529732                  |
|                             | WT vs H3K36R lea1Δ     | 0.0010053                  |
|                             | ist3Δ vs H3K36R        | 0.0010053                  |
|                             | lea1Δ vs H3K36R lea1Δ  | 0.0010053                  |
|                             | H3K36R vs H3K36R lea1Δ | 0.0010053                  |
|                             |                        |                            |
| <b>RPS21B</b>               | WT vs lea1Δ            | 0.0021445                  |
|                             | WT vs H3K36R           | 0.1502983                  |
|                             | WT vs H3K36R lea1Δ     | 0.0150307                  |
|                             | ist3Δ vs H3K36R        | 0.0479099                  |
|                             | lea1Δ vs H3K36R lea1Δ  | 0.4429986                  |
|                             | H3K36R vs H3K36R lea1Δ | 0.4038531                  |
|                             |                        |                            |
| <b>TEF5</b>                 | WT vs lea1Δ            | 0.0650792                  |
|                             | WT vs H3K36R           | 0.0465317                  |
|                             | WT vs H3K36R lea1Δ     | 0.0010053                  |
|                             | ist3Δ vs H3K36R        | 0.0010872                  |
|                             | lea1Δ vs H3K36R lea1Δ  | 0.0122669                  |
|                             | H3K36R vs H3K36R lea1Δ | 0.0010053                  |

**Table S6. Tukey method p-values for Figure 5.**

| <b>Gene analyzed by RT-qPCR</b> | <b>Treatment Pair</b>           | <b>p-value</b> |
|---------------------------------|---------------------------------|----------------|
| <b><i>DBP2</i></b>              | WT vs set2Δ                     | 0.0081695      |
|                                 | WT vs set2- H199L               | 0.0010053      |
|                                 | WT vs set2-R195C                | 0.0010053      |
|                                 | WT vs set2-SRIΔ                 | 0.0010053      |
|                                 | WT vs set2-K663L                | 0.7748568      |
|                                 | WT vs set2-H199L K663L          | 0.0015543      |
|                                 | set2Δ vs set2- H199L            | 0.793005       |
|                                 | set2Δ vs set2-R195C             | 0.0010053      |
|                                 | set2Δ vs set2-SRIΔ              | 0.0097685      |
|                                 | set2Δ vs set2-K663L             | 0.0992895      |
|                                 | set2Δ vs set2-H199L K663L       | 0.8999947      |
|                                 | set2- H199L vs set2-R195C       | 0.0010053      |
|                                 | set2- H199L vs set2-SRIΔ        | 0.0010053      |
|                                 | set2- H199L vs set2-K663L       | 0.0087066      |
|                                 | set2- H199L vs set2-H199L K663L | 0.8999947      |
|                                 | set2-R195C vs set2-SRIΔ         | 0.0010053      |
|                                 | set2-R195C vs set2-K663L        | 0.0010053      |
|                                 | set2-R195C vs set2-H199L K663L  | 0.0010053      |
|                                 | set2-SRIΔ vs set2-K663L         | 0.8260777      |
|                                 | set2-SRIΔ vs set2-H199L K663L   | 0.0018448      |
|                                 | set2-K663L vs set2-H199L K663L  | 0.0190103      |
| <b><i>SRB2</i></b>              | WT vs set2Δ                     | 0.0017351      |
|                                 | WT vs set2- H199L               | 0.0010053      |
|                                 | WT vs set2-R195C                | 0.5642598      |
|                                 | WT vs set2-SRIΔ                 | 0.0258012      |
|                                 | WT vs set2-K663L                | 0.0141136      |
|                                 | WT vs set2-H199L K663L          | 0.0010053      |
|                                 | set2Δ vs set2- H199L            | 0.7197977      |
|                                 | set2Δ vs set2-R195C             | 0.0441594      |
|                                 | set2Δ vs set2-SRIΔ              | 0.7530135      |
|                                 | set2Δ vs set2-K663L             | 0.7199518      |
|                                 | set2Δ vs set2-H199L K663L       | 0.8929803      |
|                                 | set2- H199L vs set2-R195C       | 0.0029383      |
|                                 | set2- H199L vs set2-SRIΔ        | 0.8999947      |
|                                 | set2- H199L vs set2-K663L       | 0.1039273      |
|                                 | set2- H199L vs set2-H199L K663L | 0.1788571      |
|                                 | set2-R195C vs set2-SRIΔ         | 0.0032898      |
|                                 | set2-R195C vs set2-K663L        | 0.4637204      |
|                                 | set2-R195C vs set2-H199L K663L  | 0.3005891      |
|                                 | set2-SRIΔ vs set2-K663L         | 0.1157979      |
|                                 | set2-SRIΔ vs set2-H199L K663L   | 0.1976973      |
|                                 | set2-K663L vs set2-H199L K663L  | 0.8999947      |
| <b><i>RPS21B</i></b>            | WT vs set2Δ                     | 0.6149654      |
|                                 | WT vs set2- H199L               | 0.0170643      |
|                                 | WT vs set2-R195C                | 0.1664185      |

|             |                                 |           |
|-------------|---------------------------------|-----------|
|             | WT vs set2-SRIΔ                 | 0.8999947 |
|             | WT vs set2-K663L                | 0.0048958 |
|             | WT vs set2-H199L K663L          | 0.0010053 |
|             | set2Δ vs set2- H199L            | 0.3035886 |
|             | set2Δ vs set2-R195C             | 0.8999947 |
|             | set2Δ vs set2-SRIΔ              | 0.552635  |
|             | set2Δ vs set2-K663L             | 0.1032309 |
|             | set2Δ vs set2-H199L K663L       | 0.002552  |
|             | set2- H199L vs set2-R195C       | 0.8231855 |
|             | set2- H199L vs set2-SRIΔ        | 0.0137313 |
|             | set2- H199L vs set2-K663L       | 0.8999947 |
|             | set2- H199L vs set2-H199L K663L | 0.1558989 |
|             | set2-R195C vs set2-SRIΔ         | 0.1368805 |
|             | set2-R195C vs set2-K663L        | 0.4637287 |
|             | set2-R195C vs set2-H199L K663L  | 0.0158543 |
|             | set2-SRIΔ vs set2-K663L         | 0.0039498 |
|             | set2-SRIΔ vs set2-H199L K663L   | 0.0010053 |
|             | set2-K663L vs set2-H199L K663L  | 0.4238481 |
| <b>TEF5</b> | WT vs set2Δ                     | 0.0219581 |
|             | WT vs set2- H199L               | 0.0129503 |
|             | WT vs set2-R195C                | 0.8999947 |
|             | WT vs set2-SRIΔ                 | 0.0010053 |
|             | WT vs set2-K663L                | 0.8999947 |
|             | WT vs set2-H199L K663L          | 0.0680603 |
|             | set2Δ vs set2- H199L            | 0.8999947 |
|             | set2Δ vs set2-R195C             | 0.0214017 |
|             | set2Δ vs set2-SRIΔ              | 0.0010053 |
|             | set2Δ vs set2-K663L             | 0.0082938 |
|             | set2Δ vs set2-H199L K663L       | 0.8999947 |
|             | set2- H199L vs set2-R195C       | 0.012622  |
|             | set2- H199L vs set2-SRIΔ        | 0.0010053 |
|             | set2- H199L vs set2-K663L       | 0.0049074 |
|             | set2- H199L vs set2-H199L K663L | 0.8999947 |
|             | set2-R195C vs set2-SRIΔ         | 0.0010053 |
|             | set2-R195C vs set2-K663L        | 0.8999947 |
|             | set2-R195C vs set2-H199L K663L  | 0.0663943 |
|             | set2-SRIΔ vs set2-K663L         | 0.0010053 |
|             | set2-SRIΔ vs set2-H199L K663L   | 0.0010053 |
|             | set2-K663L vs set2-H199L K663L  | 0.0261485 |

**Supplemental Data Set information (in separate files):**

**Sorenson et al Dataset S1: Binned Flow Cytometry Data from Histone Mutants and Deletion Mutants.**

The “binned” raw data that are clustered and described in Figures 1 and S1 are available in

this.txt file and can be clustered as described in the caption of Figure S1. Each row contains binned flow cytometry data for an individual deletion or histone point mutant (labeled in first column). Columns represent a bin corresponding to a specific position on the two-dimensional mCherry vs. GFP flow cytometry dot plots. Bins are ordered from the origin to the top right, increasing in y value until the top, then shifting to the next x bin, etc. For further explanation of binning and clustering analysis, please refer to Sorenson and Stevens, RNA 2014; 20(5):732-45.

**Sorenson et al Dataset S2: CDT File for Clustered Data in Figures 1 and S1.**

This is the .cdt file to be viewed with Java TreeView. To open and retain formatting, file names for Datasets S2-S4 must be renamed with the same name, yet retain extensions.

**Sorenson et al Dataset S3: GTR File for Clustered Data in Figures 1 and S1.**

This is the .gtr file to be viewed with Java TreeView. To open and retain formatting, file names for Datasets S2-S4 must be renamed with the same name, yet retain extensions.

**Sorenson et al Dataset S4: JTV File for Clustered Data in Figures 1 and S1.**

This is the .jtv file to be viewed with Java TreeView. To open and retain formatting, file names for Datasets S2-S4 must be renamed with the same name, yet retain extensions.

Figure S1

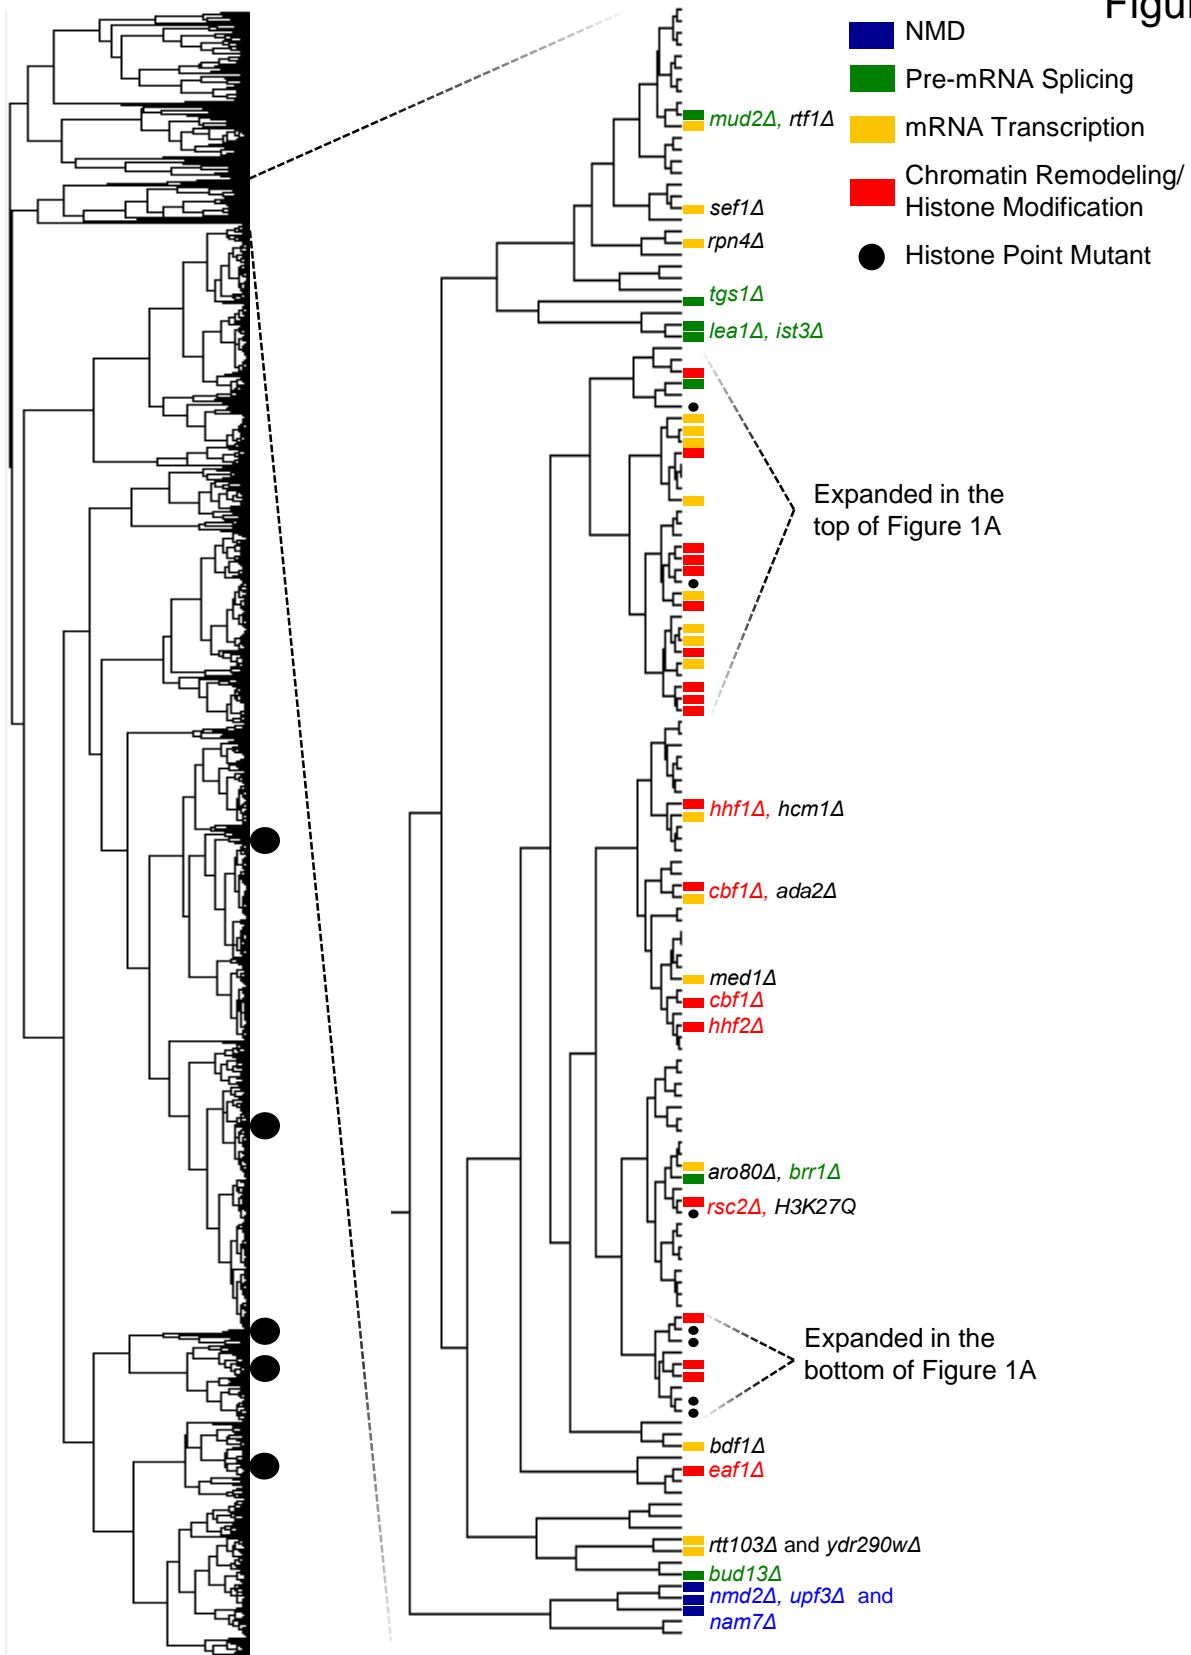

**Figure S1: Global view of the clustering of histone point mutants of interest.** Clustering behavior of histone point mutants within the deletion collection data set. Binning data for a collection of histone point mutants were integrated with the deletion collection data set, clustered with complete linkage and a centered absolute correlation similarity metric, shown on the left. The large black circles designate the clades that contain the majority of the histone point mutants, which are among wild-type-like mutants, in terms of reporter phenograph. In the middle, a cluster that contains seven specific histone point mutants and many red-shifted gene expression factor mutants is expanded and nodes are color-coded based on function or type of mutant. Highlighted clusters are expanded in Figure 1.

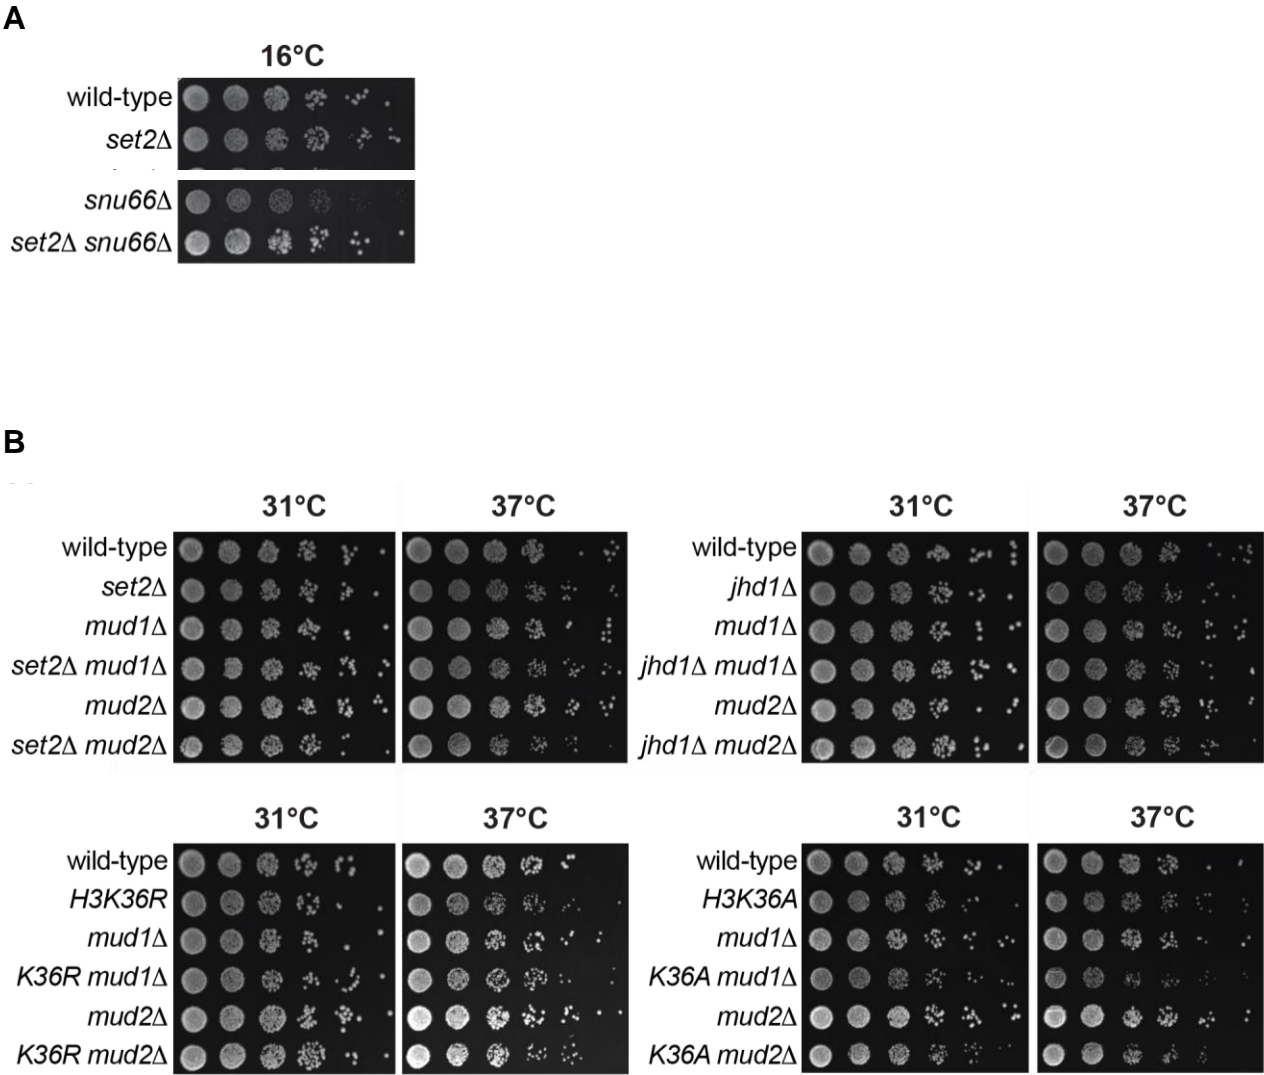

**Figure S2. A.** Deletion of *SET2* partially suppresses the cold sensitive growth defect the *snu66Δ* strain and range of mild to no genetic interaction observed between *mud1Δ* or *mud2Δ* deletion mutants and mutations that alter H3K36me. Serial dilutions of WT, single and double mutant strains grown on rich media at 16°C. Plates photographed after 10 days of growth. **B.** Mutations that alter the methylation state of H3K36 do not display genetic interactions with yeast mutants lacking the *MUD1* gene or the *MUD2* gene. Serial dilutions of WT, single and double mutant strains grown on rich media at 31°C and 37°C. Plates photographed after 48 hours growth.

Figure S3

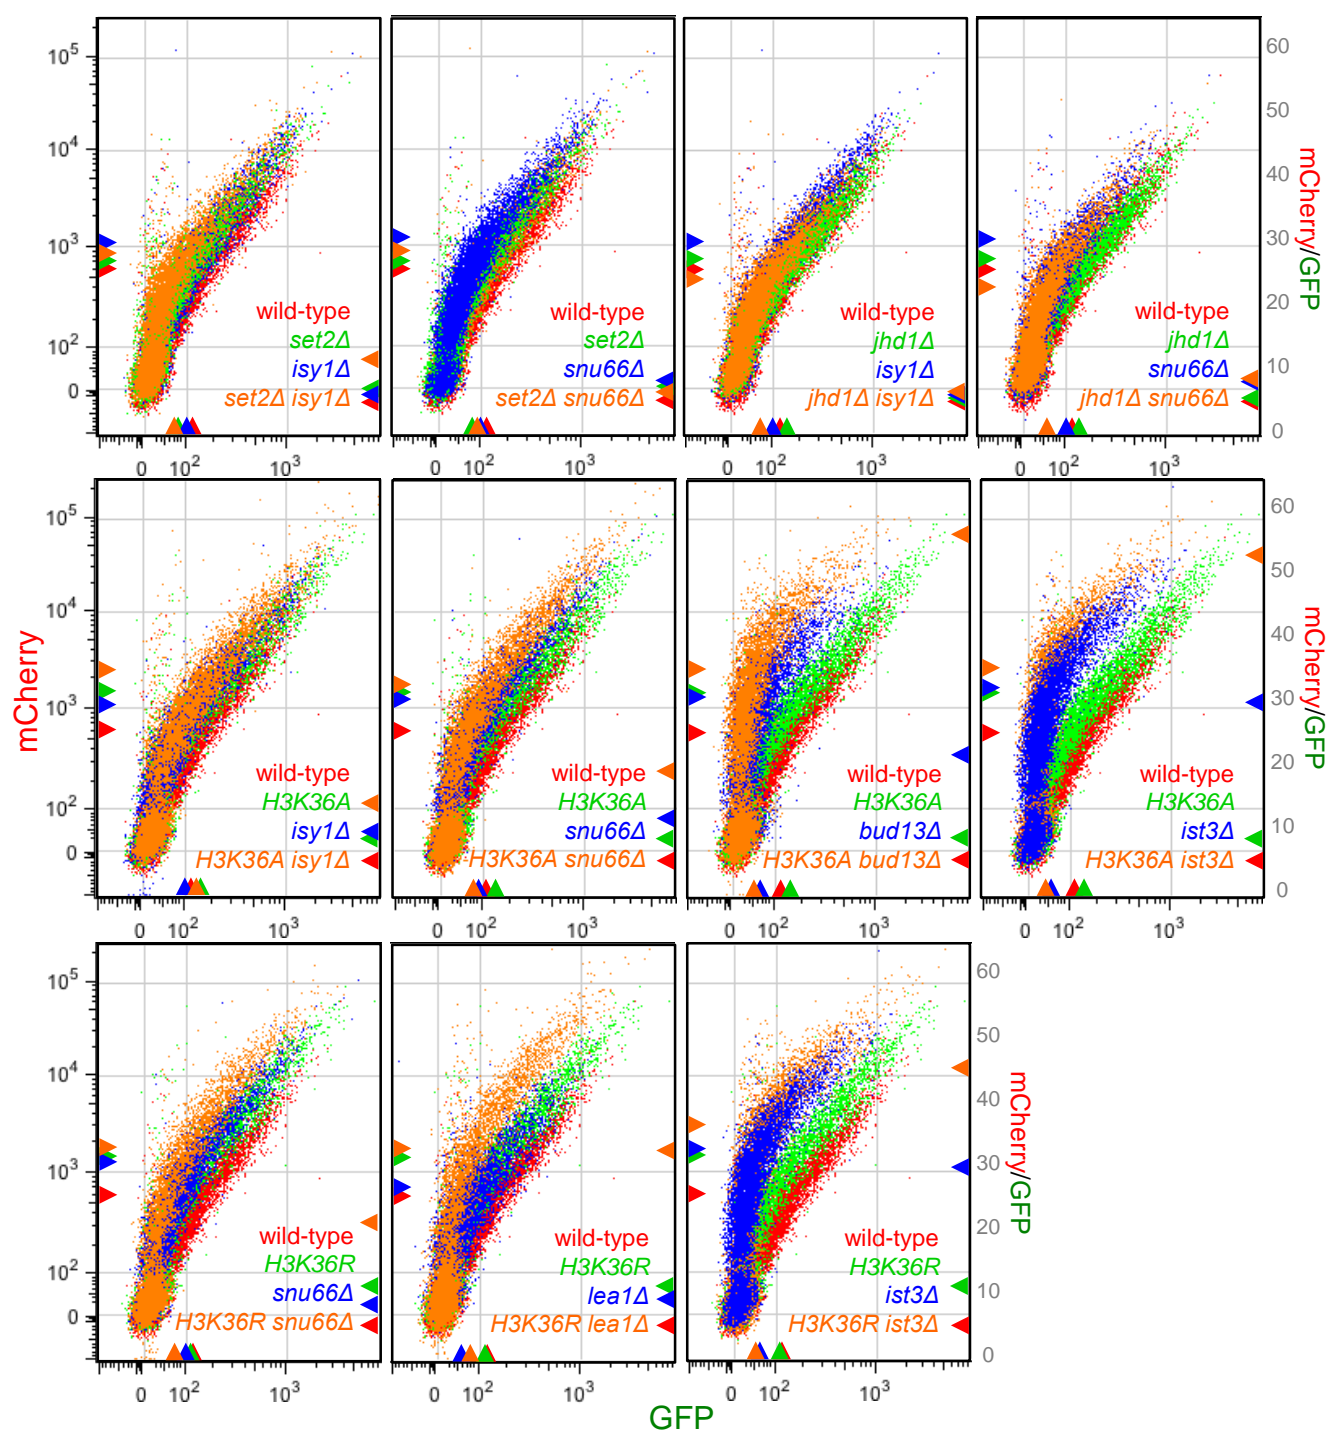

**Figure S3. Gene Expression Reporter phenographs for selected single and double mutants.** Standard flow cytometry overlays (mCherry versus GFP) are shown in each panel, depicting reporter expression in four yeast strains. Wild-type yeast is shown in red, histone modifier and point mutants are in green, pre-mRNA splicing mutants in blue and the double mutants in orange. To aid in comparing reporter expression levels the mean mCherry and GFP values for 21,000 cells are shown on y- and x-axis respectively with the colored arrowheads. To add another level means of comparison we show the mCherry/GFP ratio (unspliced/spliced) on the right of each panel (note that this is on a linear scale), serving as a proxy for pre-mRNA splicing efficiency.



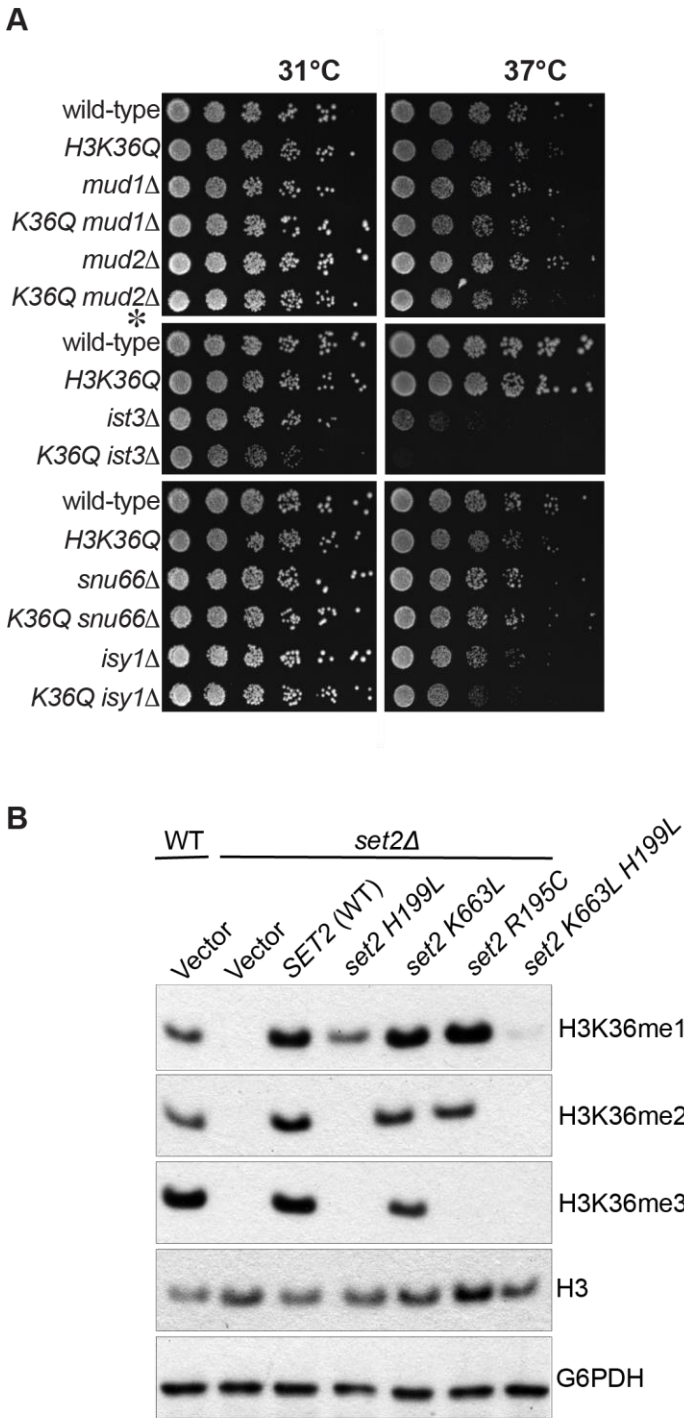

**Figure S4: H3K36 is genetically implicated in RNA splicing and effect of *set2* mutations on H3K36 methylation status.**(A) H3K36me is genetically implicated in RNA splicing. Serial dilutions of wild-type (WT), single and double mutant strains grown on rich media at 31°C and 37°C. Plates photographed after 48 hours growth (\* middle 37C panel photographed after 72 hours growth). (B) Methylation status of various *SET2* constructs used in splicing and transcriptional assays. Log phase growing cells (from indicated strains) were used to prepare whole cell extracts (using SUMEB method) and probed using indicated antibodies.

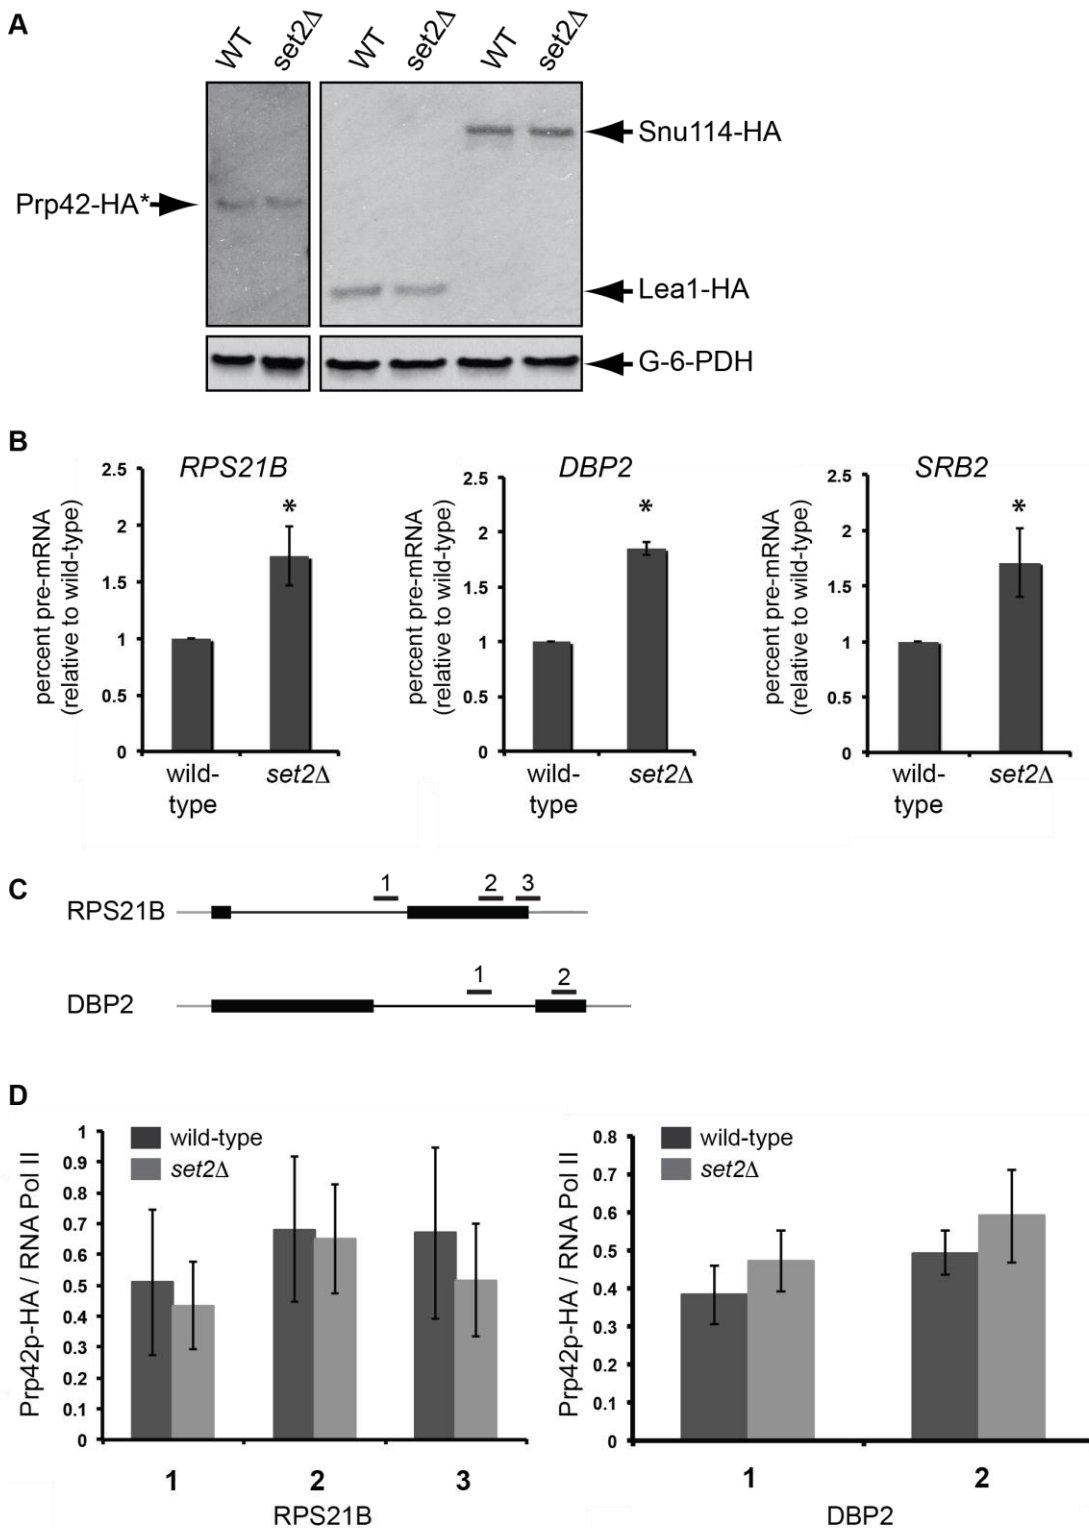

**Figure S5: Deletion of *SET2* causes a reduction in RNA splicing but does not impact HA-tagged splicing factor levels or Prp42-HA association with chromatin.** (A) Deletion of *SET2* does not alter the protein levels of the HA-tagged splicing factors. Yeast strains indicated were grown to mid-log phase (0.3-0.5), shifted to 37°C for 30 minutes, and total protein was isolated and quantitated using Bradford protein analysis. Total protein (6ug for Snu114-HA and Lea1-HA and 12ug for Prp42-HA; \* note that Prp42-HA contains a single HA tag) was run on a 10% agarose gel. Western polyclonal HA antibodies and standard ECL. (B) Deletion of *SET2* results in impaired RNA splicing. Quantitative splicing assay. cDNA generated from total RNA isolated from *set2Δ* (TYK423) and its corresponding WT (BY4741) grown at 37°C was analyzed by QPCR with primers that detect the intron levels or the total levels of the pre-mRNA indicated in the figure. Represented in the bar graph is the percent unspliced RNA (pre-mRNA), which was determined by dividing the relative amounts of the intron product (pre-mRNA) by the relative amount of the total product (total mRNA) and multiplying by 100. Error bars represent SEM; n=3, \* indicates  $p > 0.05$ . (C) Schematic of the location of the primer sets used for ChIP analysis. (D) Deletion of *SET2* does not alter U1 snRNP association with chromatin. Chromatin immunoprecipitations were carried out using  $\alpha$ -HA or  $\alpha$ -RNA pol II antibodies in a Prp42-HA strain grown at 30°C then shifted to 37°C for 30 min. Shown are the average amounts of HA-tagged protein bound relative to RNA pol II bound at the indicated regions. Error bars represent  $\pm$  SEM for each strain and primer set, n=3 biological replicates.
